# Supplementary material for: Comparison of Four Dietary Pattern Indices in Australian Baby Boomers: Findings from the Busselton Healthy Ageing Study
Source: Nutrients. 2023 Jan 28;15(3):659. doi: 10.3390/nu15030659 (PMC9922020; doi:10.3390/nu15030659)
Supplement: Supplementary file 1 [file nutrients-15-00659-s001.zip › nutrients-2103573-supplementary.pdf]

## Supplementary material

**Table S1:** Dietary Guideline Index 2013 (DGI-2013) composition by dietary guideline component and age group and sex.

| Dietary Guideline                                                       | Indicator and Description                                                                                              | Score | Criteria for Score <sup>1</sup> |                      |                      |                      |
|-------------------------------------------------------------------------|------------------------------------------------------------------------------------------------------------------------|-------|---------------------------------|----------------------|----------------------|----------------------|
|                                                                         |                                                                                                                        |       | Men 51-70 Years                 | Men 70+ Years        | Women 51-70 Years    | Females 70+ Years    |
| 1. Enjoy a wide variety of nutritious foods                             | Food variety: proportion of food from each of the five core food groups eaten at least one serve per week <sup>3</sup> | 0     | 0-19%                           | 0-19%                | 0-19%                | 0-19%                |
|                                                                         |                                                                                                                        | 2     | 20-39%                          | 20-39%               | 20-39%               | 20-39%               |
|                                                                         |                                                                                                                        | 4     | 40-59%                          | 40-59%               | 40-59%               | 40-59%               |
|                                                                         |                                                                                                                        | 6     | 60-79%                          | 60-79%               | 60-79%               | 60-79%               |
|                                                                         |                                                                                                                        | 8     | 80-91%                          | 80-91%               | 80-91%               | 80-91%               |
|                                                                         |                                                                                                                        | 10    | 91-100%                         | 91-100%              | 91-100%              | 91-100%              |
| 2. Plenty of vegetables                                                 | Total vegetable intake: servings of vegetables per day                                                                 | 0     | <1.1 servings                   | <1 servings          | <1 servings          | <1 servings          |
|                                                                         |                                                                                                                        | 2     | 1.1 to <2.2 servings            | 1 to <2 serving      | 1 to <2 serving      | 1 to <2 serving      |
|                                                                         |                                                                                                                        | 4     | 2.2 to <3.3 servings            | 2 to <3 servings     | 2 to <3 servings     | 2 to <3 servings     |
|                                                                         |                                                                                                                        | 6     | 3.3 to <4.4 servings            | 3 to <4 servings     | 3 to <4 servings     | 3 to <4 servings     |
|                                                                         |                                                                                                                        | 8     | 4.4 to <5.5 servings            | 4 to <5 servings     | 4 to <5 servings     | 4 to <5 servings     |
|                                                                         |                                                                                                                        | 10    | >=5.5 servings                  | >=5 servings         | >=5 servings         | >=5 servings         |
| 3. Fruit                                                                | Total fruit intake: servings of fruit per day                                                                          | 0     | <1 serving                      | <1 serving           | <1 serving           | <1 serving           |
|                                                                         |                                                                                                                        | 5     | 1 to <2 servings                | 1 to <2 servings     | 1 to <2 servings     | 1 to <2 servings     |
|                                                                         |                                                                                                                        | 10    | >=2 servings                    | >=2 servings         | >=2 servings         | >=2 servings         |
| 4. Grain (cereal) foods                                                 | Servings of total cereal intake per day                                                                                | 0     | 0 to <1.2 servings              | 1 to <0.9 servings   | 0 to <0.8 servings   | 0 to <0.5 servings   |
|                                                                         |                                                                                                                        | 1     | 1.2 to <2.4 serving             | 0.9 to <1.8 serving  | 0.8 to <1.6 serving  | 0.5 to <1 serving    |
|                                                                         |                                                                                                                        | 2     | 2.4 to <3.6 servings            | 1.8 to <2.7 servings | 1.6 to <2.4 servings | 1 to <2 servings     |
|                                                                         |                                                                                                                        | 3     | 3.6 to <4.8 servings            | 2.7 to <3.6 servings | 2.4 to <3.2 servings | 2 to <3 servings     |
|                                                                         |                                                                                                                        | 4     | 4.8 to <6 servings              | 3.6 to <4.5 servings | 3.2 to <4 servings   | 3 to <4 servings     |
|                                                                         |                                                                                                                        | 5     | >=6 servings                    | >=4.5 servings       | >=4 servings         | >=4 servings         |
|                                                                         | Mostly wholegrain or high fiber cereals: Type of bread usually consumed                                                | 0     | White bread                     | White bread          | White bread          | White bread          |
|                                                                         |                                                                                                                        | 5     | Wholemeal bread                 | Wholemeal bread      | Wholemeal bread      | Wholemeal bread      |
|                                                                         | Total meat and alternative: servings per day                                                                           | 0     | <2.5 servings                   | <2.5 servings        | <2 servings          | <2 servings          |
|                                                                         |                                                                                                                        | 5     | ≥2.5 servings                   | ≥2.5 servings        | ≥2 servings          | ≥2 servings          |
| 5. Lean meat and poultry, fish, eggs, nuts and seeds, and legumes/beans | Lean meat: proportion of lean meats and alternatives to total meat and alternatives per day                            | 0     | 0-19%                           | 0-19%                | 0-19%                | 0-19%                |
|                                                                         |                                                                                                                        | 1     | 20-39%                          | 20-39%               | 20-39%               | 20-39%               |
|                                                                         |                                                                                                                        | 2     | 40-59%                          | 40-59%               | 40-59%               | 40-59%               |
|                                                                         |                                                                                                                        | 3     | 60-79%                          | 60-79%               | 60-79%               | 60-79%               |
|                                                                         |                                                                                                                        | 4     | 80-91%                          | 80-91%               | 80-91%               | 80-91%               |
|                                                                         |                                                                                                                        | 5     | 91-100%                         | 91-100%              | 91-100%              | 91-100%              |
|                                                                         |                                                                                                                        | 5     | 91-100%                         | 91-100%              | 91-100%              | 91-100%              |
| 6. Milk, yoghurt, cheese and/or their alternatives                      | Total dairy and alternative: servings per day                                                                          | 0     | 0 to <0.5 servings              | 0 to <0.7 servings   | 0 to <0.8 servings   | 0 to <0.8 servings   |
|                                                                         |                                                                                                                        | 2     | 0.5 to <1 servings              | 0.7 to <1.4 servings | 0.8 to <1.6 servings | 0.8 to <1.6 servings |
|                                                                         |                                                                                                                        | 4     | 1 to <1.5 serving               | 1.4 to <2.1 serving  | 1.6 to <2.4 serving  | 1.6 to <2.4 serving  |
|                                                                         |                                                                                                                        | 6     | 1.5 to <2 servings              | 2.1 to <2.8 servings | 2.4 to <3.2 servings | 2.4 to <3.2 servings |
|                                                                         |                                                                                                                        | 8     | 2 to <2.5 servings              | 2.8 to <3.5 servings | 3.2 to <4 servings   | 3.2 to <4 servings   |
|                                                                         |                                                                                                                        | 10    | >=2.5 servings                  | >=3.5 servings       | >=4 servings         | >=4 servings         |
|                                                                         | Proportion of low fat dairy to total dairy >=50% per day.                                                              | 0     | <50%                            | <50%                 | <50%                 | <50%                 |
|                                                                         |                                                                                                                        | 5     | >=50%                           | >=50%                | >=50%                | >=50%                |
| 7. Drink plenty of water                                                | Total beverage intake: servings per day                                                                                | 0     | <10 servings                    | <10 servings         | <8 servings          | <8 servings          |
|                                                                         |                                                                                                                        | 5     | ≥10 servings                    | ≥10 servings         | ≥8 servings          | ≥8 servings          |
|                                                                         | Proportion of water to total beverage intake per day                                                                   | 0     | <50%                            | <50%                 | <50%                 | <50%                 |
|                                                                         |                                                                                                                        | 5     | >=50%                           | >=50%                | >=50%                | >=50%                |
| 8. Limit intake of foods or drinks high in saturated fat,               | Limit discretionary food intake: servings per day <sup>2</sup>                                                         | 0     | >=2.5 servings                  | >=2.5 servings       | >=2.5 servings       | >=2 servings         |
|                                                                         |                                                                                                                        | 5     | 1 to <2.5 servings              | 1 to <2.5 servings   | 1 to <2.5 servings   | 1 to <2 servings     |

|                                                              |                                                           |     |                                             |                                             |                                             |                                             |
|--------------------------------------------------------------|-----------------------------------------------------------|-----|---------------------------------------------|---------------------------------------------|---------------------------------------------|---------------------------------------------|
| and containing added salt and sugar                          |                                                           | 10  | <1 serving                                  | <1 serving                                  | <1 serving                                  | <1 serving                                  |
| 9. Limit intake of foods high in saturated fat               | Trim meat: visible fat on meat consumption                | 0   | Eat most of it                              |
|                                                              |                                                           | 2.5 | Eat some of it                              |
|                                                              |                                                           | 5   | Eat as little as possible or Don't eat meat | Eat as little as possible or Don't eat meat | Eat as little as possible or Don't eat meat | Eat as little as possible or Don't eat meat |
|                                                              | Proportion of low fat diary to total dairy >=50% per day. | 0   | <50%                                        | <50%                                        | <50%                                        | <50%                                        |
|                                                              |                                                           | 5   | >=50%                                       | >=50%                                       | >=50%                                       | >=50%                                       |
| 10. Small allowance of unsaturated oils, fats or spreads     | Unsaturated spreads and oils: servings per day            | 0   | >4 servings                                 | >4 servings                                 | >2 servings                                 | >2 servings                                 |
|                                                              |                                                           | 10  | <=4 servings                                | <=4 servings                                | <=2 servings                                | <=2 servings                                |
| 11. Limit intake of foods and drinks containing added salt   | Salt added to cooking or food                             | 10  | no                                          | no                                          | no                                          | no                                          |
|                                                              |                                                           | 0   | yes                                         | yes                                         | yes                                         | yes                                         |
| 12. Limit intake of foods and drinks containing added sugars | Limit extra sugar: added to food teaspoons (tsp) per day  | 0   | sugar (tsp) >4                              | sugar (tsp) >4                              | sugar (tsp) >4                              | sugar (tsp) >4                              |
|                                                              |                                                           | 2   | 3<sugar (tsp) <=4                           | 3<sugar (tsp) <=4                           | 3<sugar (tsp) <=4                           | 3<sugar (tsp) <=4                           |
|                                                              |                                                           | 4   | 2<sugar (tsp) <=3                           | 2<sugar (tsp) <=3                           | 2<sugar (tsp) <=3                           | 2<sugar (tsp) <=3                           |
|                                                              |                                                           | 6   | 1<sugar (tsp) <=2                           | 1<sugar (tsp) <=2                           | 1<sugar (tsp) <=2                           | 1<sugar (tsp) <=2                           |
|                                                              |                                                           | 8   | 0< sugar (tsp) <=1                          | 0< sugar (tsp) <=0                          | 0< sugar (tsp) <=0                          | 0< sugar (tsp) <=0                          |
|                                                              |                                                           | 10  | sugar (tsp)= 0                              | sugar (tsp)= 0                              | sugar (tsp)= 0                              | sugar (tsp)= 0                              |
| 13. If you choose to drink alcohol, limit intake             | Limit alcohol: servings per day                           | 0   | >2 servings                                 | >2 servings                                 | >2 servings                                 | >2 servings                                 |
|                                                              |                                                           | 10  | <= 2 servings                               | <= 2 servings                               | <= 2 servings                               | <= 2 servings                               |
| Min total Score                                              |                                                           | 0   |                                             |                                             |                                             |                                             |
| Max total Score                                              |                                                           | 130 |                                             |                                             |                                             |                                             |

<sup>1</sup>Criteria of maximum and minimum scores based on the DGI-2013 [1], with criteria added to create intermediate scores. <sup>2</sup>Alcohol excluded, alcohol intake is already captured separately in component 13 instead. <sup>3</sup>Meat and meat products excluded from denominator of ratio for those following vegetarian diet.

**Table S2:** EAT- Lancet Score composition by dietary subcomponent.

| Dietary Components               | Score | Score criteria <sup>1</sup> (All ages and sex) |
|----------------------------------|-------|------------------------------------------------|
| 1. Vegetables                    | 0     | <100 g/day                                     |
|                                  | 1     | 100 - 200 g/day                                |
|                                  | 2     | 200 - 300 g/day                                |
|                                  | 3     | >300 g/day                                     |
| 2. Fruits                        | 0     | <50 g/day                                      |
|                                  | 1     | 50 - 100 g/day                                 |
|                                  | 2     | 100 - 200 g/day                                |
|                                  | 3     | >200 g/day                                     |
| 3. Unsaturated Oils <sup>3</sup> | 0     | <10 g/day                                      |
|                                  | 0.5   | 10 - 20 g/day                                  |
|                                  | 1     | 20 - 40 g/day                                  |
|                                  | 1.5   | >40 g/day                                      |
| 4. Legumes                       | 0     | <18.75 g/day                                   |
|                                  | 1     | 18.75 - 37.5 g/day                             |
|                                  | 2     | 37.5 - 75 g/day                                |
|                                  | 3     | >75 g/day                                      |
| 5. Nuts                          | 0     | <12.5 g/day                                    |
|                                  | 1     | 12.5 - 25 g/day                                |
|                                  | 2     | 25 - 50 g/day                                  |
|                                  | 3     | >50 g/day                                      |
| 6. Wholegrains                   | 0     | <58 g/day                                      |
|                                  | 1     | 58 - 116 g/day                                 |
|                                  | 2     | 116 - 232 g/day                                |
|                                  | 3     | >232 g/day                                     |
| 7. Fish                          | 0     | <7 g/day                                       |
|                                  | 1     | 7 - 14 g/day                                   |
|                                  | 2     | 14 - 28 g/day                                  |
|                                  | 3     | >28 g/day                                      |
| 8. Beef/Lamb/Pork <sup>4</sup>   | 0     | > 56 g/day                                     |
|                                  | 2     | 28 - 56 g/day                                  |
|                                  | 4     | 14 - 28 g/day                                  |
|                                  | 6     | <14 g/day                                      |
| 9. Poultry                       | 0     | > 116 g/day                                    |
|                                  | 1     | 58 - 116 g/day                                 |
|                                  | 2     | 29 - 58 g/day                                  |
|                                  | 3     | <29 g/day                                      |
| 10. Eggs                         | 0     | > 50 g/day                                     |
|                                  | 1     | 25 - 50 g/day                                  |
|                                  | 2     | 13 - 25 g/day                                  |
|                                  | 3     | <13 g/day                                      |
| 11. Dairy                        | 0     | > 1000 g/day                                   |
|                                  | 1     | 500 - 1000 g/day                               |
|                                  | 2     | 250 - 500 g/day                                |
|                                  | 3     | <250 g/day                                     |
| 12. Potatoes                     | 0     | > 200 g/day                                    |
|                                  | 1     | 100 - 200 g/day                                |
|                                  | 2     | 50 - 100 g/day                                 |
|                                  | 3     | <50 g/day                                      |

|                       |     |                |
|-----------------------|-----|----------------|
| 13. Added Sugar       | 0   | > 124 g/day    |
|                       | 1   | 62 - 124 g/day |
|                       | 2   | 31 - 62 g/day  |
|                       | 3   | <31 g/day      |
| 14. Lard <sup>2</sup> | 0   | > 10 g/day     |
|                       | 0.5 | 5 - 10 g/day   |
|                       | 1   | 1 - 5 g/day    |
|                       | 1.5 | 0 g/day        |
| Min total Score       | 0   |                |
| Max total Score       | 42  |                |

<sup>1</sup> Criteria for scores based on the revised EAT-Lancet Index [2]. <sup>2</sup> Lard included as original EAT-Lancet Index recommended [3]. <sup>3</sup> Points allocated to unsaturated oils halved to accommodate for lard inclusion. <sup>4</sup> Beef/lamb/pork combined into one category as the food frequency questionnaire did not distinguish between these meat types.

**Table S3:** Mediterranean Diet Index (MedDiet) composition by dietary component.

| Dietary Components        | Score | Score criteria for females (intake g/day) | Score criteria for males (intake g/day) |
|---------------------------|-------|-------------------------------------------|-----------------------------------------|
| 1. Vegetables             | 0     | below the median                          | below the median                        |
|                           | 1     | above the median                          | above the median                        |
| 2. Fruit and nuts         | 0     | below the median                          | below the median                        |
|                           | 1     | above the median                          | above the median                        |
| 3. Cereals                | 0     | below the median                          | below the median                        |
|                           | 1     | above the median                          | above the median                        |
| 4. Legumes                | 0     | below the median                          | below the median                        |
|                           | 1     | above the median                          | above the median                        |
| 5. Fish                   | 0     | below the median                          | below the median                        |
|                           | 1     | above the median                          | above the median                        |
| 6. Meat                   | 0     | above the median                          | above the median                        |
|                           | 1     | below the median                          | below the median                        |
| 7. Dairy                  | 0     | above the median                          | above the median                        |
|                           | 1     | below the median                          | below the median                        |
| 8. Olive Oil <sup>2</sup> | 0     | below the median                          | below the median                        |
|                           | 1     | above the median                          | above the median                        |
| 9. Alcohol                | 0     | $5 \geq \text{ethanol g/day} \geq 25$     | $10 \geq \text{ethanol g/day} \geq 50$  |
|                           | 1     | $5 \leq \text{ethanol g/day} \leq 25$     | $10 \leq \text{ethanol g/day} \leq 50$  |
| Min total Score           | 0     |                                           |                                         |
| Max total Score           | 9     |                                           |                                         |

<sup>1</sup> Criteria for scores based on the Mediterranean Diet Index (MedDiet). <sup>2</sup> Olive oil used instead of the saturated fat ratio [4].

**Table S4:** Literature Based Mediterranean Diet Index (Lit- MedDiet) composition by dietary component.

| Dietary Components        | Score | Score criteria (All ages and sex) <sup>1</sup> |
|---------------------------|-------|------------------------------------------------|
| 1. Fruit                  | 0     | <150 g/day                                     |
|                           | 1     | 150 - 225 g/day                                |
|                           | 2     | >300 g/day                                     |
| 2. Vegetables             | 0     | <100 g/day                                     |
|                           | 1     | 100-250 g/day                                  |
|                           | 2     | >250 g/day                                     |
| 3. Legumes                | 0     | <70 g/week                                     |
|                           | 1     | 70-140 g/week                                  |
|                           | 2     | >140 g/week                                    |
| 4. Cereals                | 0     | <130g/day                                      |
|                           | 1     | 130-195 g/day                                  |
|                           | 2     | >195 g/day                                     |
| 5. Fish                   | 0     | <100 g/week                                    |
|                           | 1     | 100-250 g/week                                 |
|                           | 2     | >250 g/week                                    |
| 6. Meat                   | 0     | > 120g/day                                     |
|                           | 1     | 80-120 g/day                                   |
|                           | 2     | <80 g/day                                      |
| 7. Dairy Products         | 0     | >270g/day                                      |
|                           | 1     | 180-270 g/day                                  |
|                           | 2     | <180 g/day                                     |
| 8. Alcohol                | 0     | > 24g/day                                      |
|                           | 1     | <12 g/day                                      |
|                           | 2     | 12-24 g/day                                    |
| 9. Olive Oil <sup>2</sup> | 0     | less than once per week                        |
|                           | 1     | 1 – 6 times per week                           |
|                           | 2     | daily or 2+ times per day                      |
| Min total Score           | 0     |                                                |
| Max total Score           | 18    |                                                |

<sup>1</sup> Criteria for scores based on the Literature-Based Mediterranean Diet Index [5]. <sup>2</sup> Olive oil criteria modified to align with food frequency questionnaire.

**Table S5:** Median and (Q1-Q3) of Mediterranean Diet Index subcomponent scores.

| <b>MedDiet (0-9)</b> | <b>Median (Q1-Q3)<sup>1</sup></b> |
|----------------------|-----------------------------------|
| <b>Total Score</b>   | 4 (3-5)                           |
| <b>Food Groups</b>   |                                   |
| Fruit                | 1 (0-1)                           |
| Vegetables           | 0 (0-1)                           |
| Legumes              | 1 (0-1)                           |
| Cereals              | 1 (0-1)                           |
| Fish                 | 0 (0-1)                           |
| Meat                 | 0 (0-1)                           |
| Dairy                | 0 (0-1)                           |
| Alcohol              | 0 (0-1)                           |
| Olive Oil            | 0 (0-0)                           |

<sup>1</sup> Median [Q1-Q3] total scores and subcomponent scores for individual food groups for the Mediterranean Diet Index.

**Table S6:** Percent achieving Mediterranean Diet Index subcomponent scores.

| <b>MedDiet Food Groups</b> | <b>0 points<br/>% (n)<sup>1</sup></b> | <b>1 point<br/>% (n)<sup>1</sup></b> |
|----------------------------|---------------------------------------|--------------------------------------|
| Fruit                      | 59.9 (1725)                           | 50.1 (1733)                          |
| Vegetables                 | 50.2 (1735)                           | 49.8 (1723)                          |
| Legumes                    | 48.6 (1679)                           | 51.4 (1779)                          |
| Cereals                    | 49.9 (1726)                           | 50.1 (1732)                          |
| Fish                       | 50.5 (1746)                           | 49.5 (1712)                          |
| Meat                       | 50.6 (1748)                           | 49.4 (1710)                          |
| Dairy                      | 50.8 (1756)                           | 49.2 (1702)                          |
| Alcohol                    | 53.8 (1860)                           | 46.2 (1598)                          |
| Olive Oil                  | 78.9 (2729)                           | 21.1 (729)                           |

<sup>1</sup> Percent (n) of participants achieving minimum and maximum scores for individual food groups of the Mediterranean Diet Index.

**Table S7:** Median and (Q1-Q3) of Literature-Based Mediterranean Diet Index (Lit-MedDiet) subcomponent scores.

| <b>Lit-MedDiet (0-18)</b> | <b>Median (Q1-Q3)<sup>1</sup></b> |
|---------------------------|-----------------------------------|
| <b>Total Score</b>        | 8 (6-9)                           |
| <b>Food Groups</b>        |                                   |
| Fruit                     | 1 (0-2)                           |
| Vegetables                | 2 (2-2)                           |
| Legumes                   | 0 (0-2)                           |
| Cereals                   | 0 (0-1)                           |
| Fish                      | 1 (1-2)                           |
| Meat                      | 0 (0-1)                           |
| Dairy                     | 0 (0-1)                           |
| Alcohol                   | 1 (1-1)                           |
| Olive Oil                 | 0 (0-0)                           |

<sup>1</sup> Median [Q1-Q3] total scores and subcomponent scores for individual food groups for the Literature-Based Mediterranean Diet Index.

**Table S8:** Percent achieving Literature-Based Mediterranean Diet Index (Lit-MedDiet) subcomponent scores.

| <b>Lit-MedDiet Food Groups</b> | <b>0 points<br/>% (n)<sup>1</sup></b> | <b>1 point<br/>% (n)<sup>1</sup></b> | <b>2 points<br/>% (n)<sup>1</sup></b> |
|--------------------------------|---------------------------------------|--------------------------------------|---------------------------------------|
| Fruit                          | 31.8 (1101)                           | 34.2 (1184)                          | 34.0 (1173)                           |
| Vegetables                     | 1.2 (43)                              | 13.1 (452)                           | 85.7 (2963)                           |
| Legumes                        | 50.4 (1744)                           | 22.3 (771)                           | 27.3 (943)                            |
| Cereals                        | 62.9 (2175)                           | 20.6 (713)                           | 16.5 (570)                            |
| Fish                           | 22.9 (793)                            | 38.3 (1323)                          | 38.8 (1342)                           |
| Meat                           | 63.8 (2205)                           | 18.6 (644)                           | 17.6 (609)                            |
| Dairy                          | 60.3 (2085)                           | 29.4 (1018)                          | 10.3 (355)                            |
| Alcohol                        | 23.1 (797)                            | 54.8 (1896)                          | 22.1 (765)                            |
| Olive Oil                      | 78.4 (2712)                           | 20.3 (703)                           | 1.2 (43)                              |

<sup>1</sup> Percent (n) of participants achieving minimum, intermediate, and maximum scores for individual food groups of the Literature-Based Mediterranean Diet Index.

**Table S9:** Median and (Q1-Q3) of EAT-Lancet Index subcomponent scores.

| EAT-Lancet Index (0- 42) | Median (Q1-Q3) <sup>1</sup> |
|--------------------------|-----------------------------|
| <b>Total Score</b>       | 19 (17-21)                  |
| <b>Food Groups</b>       |                             |
| Fruit                    | 2 (2-3)                     |
| Vegetables               | 3 (2-3)                     |
| Legumes                  | 0 (0-1)                     |
| Wholegrains              | 0 (0-1)                     |
| Fish                     | 3 (2-3)                     |
| Meat                     | 0 (0-0)                     |
| Dairy                    | 2 (2-3)                     |
| Added Sugar              | 3 (2-3)                     |
| Egg                      | 2 (1-3)                     |
| Lard                     | 3 (3-3)                     |
| Unsaturated Fat          | 1 (0-1)                     |
| Poultry                  | 3 (3-3)                     |
| Potato                   | 2 (1-3)                     |
| Nuts                     | 0 (0-0)                     |

<sup>1</sup> Median [Q1-Q3] total scores and subcomponent scores for individual food groups for the EAT-Lancet Index.

**Table S10:** Percent achieving EAT-Lancet Index subcomponent scores.

| EAT-Lancet Index Food Groups         | 0 points<br>% (n) <sup>1</sup> | 1 point<br>% (n) <sup>1</sup> | 2 points<br>% (n) <sup>1</sup> | 3 points<br>% (n) <sup>1</sup> |
|--------------------------------------|--------------------------------|-------------------------------|--------------------------------|--------------------------------|
| Fruit                                | 2.95 (102)                     | 10.6 (367)                    | 26.0 (898)                     | 55.1 (1907)                    |
| Vegetables                           | 3.0 (102)                      | 12.17 (421)                   | 21.0 (721)                     | 64.0 (2214)                    |
| Legumes                              | 68.1 (2353)                    | 17.4 (603)                    | 9.5 (327)                      | 5.1 (175)                      |
| Wholegrains                          | 56.0 (1938)                    | 26.0 (900)                    | 16.1 (556)                     | 1.8 (64)                       |
| Fish                                 | 7.1 (247)                      | 12.8 (442)                    | 29.4 (1018)                    | 50.6 (1751)                    |
| Dairy                                | 4.4 (151)                      | 19.3 (669)                    | 39.9 (1381)                    | 36.3 (1257)                    |
| Added Sugar                          | 1.4 (48)                       | 10.4 (359)                    | 33.0 (1142)                    | 55.2 (1909)                    |
| Egg                                  | 17.9 (620)                     | 27.4 (946)                    | 22.6 (783)                     | 32.1 (1109)                    |
| Poultry                              | 0.4 (14)                       | 1.7 (58)                      | 12.1 (417)                     | 85.9 (2969)                    |
| Potato                               | 9.1 (316)                      | 37.3 (1289)                   | 25.9 (895)                     | 27.7 (958)                     |
| Nuts                                 | 76.2 (2634)                    | 14.8 (513)                    | 7.6 (264)                      | 1.4 (47)                       |
| <b>EAT-Lancet Score Index Groups</b> | <b>0 points<br/>% (n)</b>      | <b>2 points<br/>% (n)</b>     | <b>4 points<br/>% (n)</b>      | <b>6 points<br/>% (n)</b>      |
| Meat                                 | 86.7 (2998)                    | 6.6 (228)                     | 2.0 (70)                       | 4.7 (162)                      |
| <b>EAT-Lancet Score Index Groups</b> | <b>0 points<br/>% (n)</b>      | <b>0.5 points<br/>% (n)</b>   | <b>1 points<br/>% (n)</b>      | <b>1.5 points<br/>% (n)</b>    |
| Lard                                 | 0.4 (13)                       | 0.5 (19)                      | 0.6 (22)                       | 98.4 (3404)                    |
| Unsaturated Fat                      | 47.3 (1635)                    | 46.4 (1603)                   | 6.2 (214)                      | 0.1 (6)                        |

<sup>1</sup> Percent (n) of participants achieving minimum, intermediate, and maximum scores for individual food groups of the EAT-Lancet Index.

**Table S11:** Median and (Q1-Q3) of DGI-2013 subcomponent scores.

| <b>DGI-2013 Score (0- 130)</b> | <b>Median (Q1-Q3)<sup>1</sup></b> |
|--------------------------------|-----------------------------------|
| <b>Total Score</b>             | 70 (59-81)                        |
| <b>Food Groups</b>             |                                   |
| Vegetables                     | 8 (6-10)                          |
| Fruit                          | 10 (5-10)                         |
| Cereals                        | 1 (1-2)                           |
| Wholegrain Emphasis            | 5 (0-5)                           |
| Meat                           | 5 (5-5)                           |
| Lean Meat Ratio                | 3 (1-3)                           |
| Dairy                          | 6 (4-10)                          |
| Low Fat Dairy Ratio            | 0 (0-5)                           |
| Beverages                      | 0 (0-5)                           |
| Water Ratio                    | 0 (0-5)                           |
| Discretionary Foods            | 5 (0-5)                           |
| Variety                        | 4 (2-4)                           |
| Saturated Fats                 | 5 (3-5)                           |
| Unsaturated Fats               | 0 (0-0)                           |
| Added Salt                     | 0 (0-10)                          |
| Added Sugar                    | 10 (8-10)                         |
| Alcohol                        | 10 (0-10)                         |

<sup>1</sup> Median [Q1-Q3] total scores and subcomponent scores for individual food groups for the DGI-2013.

**Table S12:** Percent achieving DGI-2013 subcomponent scores.

|                                   | <b>0 points</b>          | <b>1 point</b>           | <b>2 points</b>          | <b>3 points</b>          | <b>4 points</b>          | <b>5 points</b>          |
|-----------------------------------|--------------------------|--------------------------|--------------------------|--------------------------|--------------------------|--------------------------|
| <b>DGI-2013 Score Food Groups</b> | <b>% (n)<sup>1</sup></b> |
| Cereals                           | 21.7 (750)               | 37.3 (1289)              | 22.2 (768)               | 9.1 (316)                | 5.0 (173)                | 4.7 (162)                |
| Lean Meat Ratio                   | 9.1 (316)                | 19.1 (659)               | 20.9 (723)               | 37.0 (1278)              | 10.5 (364)               | 3.4 (118)                |
|                                   | <b>0 points</b>          | <b>2 points</b>          | <b>4 points</b>          | <b>6 points</b>          | <b>8 points</b>          | <b>10 points</b>         |
|                                   | <b>% (n)</b>             |
| Vegetables                        | 0.9 (31)                 | 5.9 (203)                | 10.6 (366)               | 15.2 (526)               | 17.6 (609)               | 49.8 (1723)              |
| Variety                           | 5.0 (173)                | 42.2 (1458)              | 46.1 (1593)              | 6.7 (233)                | 0.0 (0)                  | 0.0 (1)                  |
| Dairy                             | 7.8 (269)                | 12.4 (429)               | 18.3 (632)               | 15.8 (545)               | 13.5 (466)               | 32.3 (1117)              |
| Added Sugar                       | 4.1 (142)                | 3.2 (110)                | 4.0 (140)                | 7.8 (269)                | 13.0 (448)               | 67.9 (2349)              |
|                                   | <b>0 points</b>          | <b>5 points</b>          | <b>10 points</b>         |                          |                          |                          |
|                                   | <b>% (n)</b>             | <b>% (n)</b>             | <b>% (n)</b>             |                          |                          |                          |
| Fruit                             | 14.5 (500)               | 18.7 (646)               | 66.9 (2312)              |                          |                          |                          |
| Discretionary Foods               | 45.8 (1585)              | 39.1 (1352)              | 15.1 (521)               |                          |                          |                          |
|                                   | <b>0 points</b>          | <b>2.5 points</b>        | <b>5 points</b>          |                          |                          |                          |
|                                   | <b>% (n)</b>             | <b>% (n)</b>             | <b>% (n)</b>             |                          |                          |                          |
| Saturated Fats                    | 13.6 (472)               | 24.7 (854)               | 61.6 (2132)              |                          |                          |                          |
|                                   | <b>0 points</b>          | <b>10 points</b>         |                          |                          |                          |                          |
|                                   | <b>% (n)</b>             | <b>% (n)</b>             |                          |                          |                          |                          |
| Added Salt                        | 65.7 (2273)              | 34.3 (1185)              |                          |                          |                          |                          |
| Alcohol                           | 26.5 (915)               | 73.5 (2543)              |                          |                          |                          |                          |
|                                   | <b>0 points</b>          | <b>5 points</b>          |                          |                          |                          |                          |
|                                   | <b>% (n)</b>             | <b>% (n)</b>             |                          |                          |                          |                          |
| Unsaturated Fats                  | 95.4 (3300)              | 4.6 (158)                |                          |                          |                          |                          |
| Water Ratio                       | 58.4 (2019)              | 41.6 (1439)              |                          |                          |                          |                          |
| Beverages                         | 50.3 (1738)              | 49.7 (1720)              |                          |                          |                          |                          |
| Meat                              | 12.4 (428)               | 87.6 (3030)              |                          |                          |                          |                          |
| Low Fat Dairy Ratio               | 55.8 (1928)              | 44.3 (1530)              |                          |                          |                          |                          |
| Wholegrain Emphasis               | 39.3 (1360)              | 60.7 (2098)              |                          |                          |                          |                          |

<sup>1</sup> Percent (n) of participants achieving minimum, intermediate, and maximum scores for individual food groups of the DGI-2013.

**Table S13.** Examples of food and ingredients included in food groups for the EAT-Lancet Index , Dietary Guideline Index 2013 (DGI-2013), the Mediterranean Diet Index, and the Literature-Based Mediterranean Diet Index.

| Food group          | DGI 2013 <sup>1</sup>                                                                                                                | EAT-Lancet Index <sup>1</sup>                                                           | MedDiet <sup>1</sup>                                                                    | Lit- MedDiet <sup>1</sup>                                                               |
|---------------------|--------------------------------------------------------------------------------------------------------------------------------------|-----------------------------------------------------------------------------------------|-----------------------------------------------------------------------------------------|-----------------------------------------------------------------------------------------|
| Fruit               | All fruits (fresh and tinned)                                                                                                        | All fruits (fresh and tinned)                                                           | All fruits (fresh and tinned), All nuts (including peanut spread)                       | All fruits (fresh and tinned)                                                           |
| Vegetables          | All vegetables                                                                                                                       | All vegetables (except potatoes)                                                        | All vegetables                                                                          | All vegetables                                                                          |
| Potato              | NA <sup>5</sup>                                                                                                                      | Potatoes (boiled, mashed, baked)                                                        | NA <sup>5</sup>                                                                         | NA <sup>5</sup>                                                                         |
| Cereals             | All cereals (rice, bread, oats, corn, pasta, crackers, cereal)                                                                       | NA <sup>4</sup>                                                                         | All cereals (rice, bread, oats, corn, pasta, crackers, cereal)                          | All cereals (rice, bread, oats, corn, pasta, crackers, cereal)                          |
| Wholegrains         | Wholemeal bread                                                                                                                      | <sup>c</sup> Whole bread, brown rice, whole oats, bran, wheat flakes                    | NA <sup>5</sup>                                                                         | NA <sup>5</sup>                                                                         |
| Legumes             | NA <sup>4</sup>                                                                                                                      | Lentils, beans, soybeans (peas excluded <sup>2</sup> )                                  | Lentils, beans, soybeans (peas excluded <sup>2</sup> )                                  | Lentils, beans, soybeans (peas excluded <sup>2</sup> )                                  |
| Nuts                | NA <sup>4</sup>                                                                                                                      | All nuts (including peanut spread)                                                      | NA <sup>4</sup>                                                                         | NA <sup>5</sup>                                                                         |
| Meat                | Beef, lamb, pork, poultry (including their processed meats eg. Sausage, sandwich meat), fish, meat alternatives (legumes, egg, nuts) | Beef, lamb, pork, poultry (including their processed meats e.g. Sausage, sandwich meat) | Beef, lamb, pork, poultry (including their processed meats e.g. Sausage, sandwich meat) | Beef, lamb, pork, poultry (including their processed meats e.g. Sausage, sandwich meat) |
| Lean Meat Ratio     | Lean meat (beef, lamb, pork, poultry) and alternatives (legumes, egg, nuts) <sup>3</sup>                                             | NA <sup>5</sup>                                                                         | NA <sup>5</sup>                                                                         | NA <sup>5</sup>                                                                         |
| Poultry             | NA <sup>4</sup>                                                                                                                      | All poultry                                                                             | NA <sup>4</sup>                                                                         | NA <sup>4</sup>                                                                         |
| Fish                | NA <sup>4</sup>                                                                                                                      | All fish (fresh and tinned) and seafood (e.g. prawns, crabs)                            | All fish (fresh and tinned) and seafood (e.g. prawns, crabs)                            | All fish (fresh and tinned) and seafood (e.g. prawns, crabs)                            |
| Egg                 | NA <sup>4</sup>                                                                                                                      | Poultry eggs                                                                            | NA                                                                                      | NA                                                                                      |
| Dairy               | Milk, yogurt, cheese, butter and cream                                                                                               | Milk, yogurt, cheese, butter and cream                                                  | Milk, yogurt, cheese, butter and cream                                                  | Milk, yogurt, cheese, butter and cream                                                  |
| Low Fat Dairy Ratio | <sup>c</sup> Low-fat milk, yogurt, cheese, butter                                                                                    | NA <sup>5</sup>                                                                         | NA <sup>5</sup>                                                                         | NA <sup>5</sup>                                                                         |
| Saturated Fats      | Visible fat on meat                                                                                                                  | NA <sup>4</sup>                                                                         | NA <sup>5</sup>                                                                         | NA <sup>5</sup>                                                                         |
| Lard                | NA <sup>4</sup>                                                                                                                      | Lard                                                                                    | NA <sup>5</sup>                                                                         | NA <sup>5</sup>                                                                         |
| Unsaturated Fats    | Unsaturated plant oils and spreads                                                                                                   | Unsaturated plant oils                                                                  | NA <sup>4</sup>                                                                         | NA <sup>4</sup>                                                                         |
| Olive Oil           | NA <sup>4</sup>                                                                                                                      | NA <sup>4</sup>                                                                         | Olive oil                                                                               | Olive oil                                                                               |
| Alcohol             | Ethanol from all alcoholic beverages                                                                                                 | NA <sup>5</sup>                                                                         | Ethanol from all alcoholic beverages                                                    | Ethanol from all alcoholic beverages                                                    |
| Added Sugar         | All sugar added to food by individual                                                                                                | All sugar included as ingredients in manufactured foods and beverages                   | NA <sup>5</sup>                                                                         | NA <sup>5</sup>                                                                         |
| Added Salt          | Salt added to cooking/food                                                                                                           | NA <sup>5</sup>                                                                         | NA <sup>5</sup>                                                                         | NA <sup>5</sup>                                                                         |
| Discretionary Foods | Sweets, salty snacks, processed meat and high fat processed foods                                                                    | NA <sup>5</sup>                                                                         | NA <sup>5</sup>                                                                         | NA <sup>5</sup>                                                                         |
| Variety             | Proportion of food from each core group (fruit, vegetables, meat, dairy, cereals)                                                    | NA <sup>5</sup>                                                                         | NA <sup>5</sup>                                                                         | NA <sup>5</sup>                                                                         |
| Beverages           | All beverages (water, tea, juices, soda, alcoholic beverages)                                                                        | NA <sup>5</sup>                                                                         | NA <sup>5</sup>                                                                         | NA <sup>5</sup>                                                                         |
| Water Ratio         | Water <sup>3</sup>                                                                                                                   | NA <sup>5</sup>                                                                         | NA <sup>5</sup>                                                                         | NA <sup>5</sup>                                                                         |

<sup>1</sup>Examples of foods included in each food category for the the EAT-Lancet Index, Dietary Guideline Index (DGI) 2013, Mediterranean Diet Index (MedDiet), and Literature-Based Mediterranean Diet Index (Lit-MedDiet).<sup>2</sup> Peas were included as a vegetable, as peas were grouped with vegetables in the food frequency questionnaire but fresh and dried peas could not be distinguished (fresh peas are classified by US dietary guidelines as vegetable, while dried peas are classified as a legume [6]). <sup>3</sup> Food group examples that form the numerator of a ratio component. 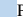 Positively scored for higher intakes; 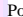 Positively scored for lower intakes; 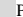 Positively scored for moderate intakes. <sup>4</sup> Food group is not in its own category but is included in another category. <sup>5</sup>Food component not part of dietary score.

**Table S14.** Model one beta coefficient estimates of the EAT-Lancet Index, Dietary Guideline Index 2013 (DGI-2013), the Mediterranean Diet Index (MedDiet), and the Literature-Based Mediterranean Diet Index (Lit-MedDiet), adjusted for Demographic and Lifestyle Factors.

| Predictor                                          | DGI-2013                         |         | EAT-Lancet Index                 |         | MedDiet                          |         | Lit-MedDiet                      |         |
|----------------------------------------------------|----------------------------------|---------|----------------------------------|---------|----------------------------------|---------|----------------------------------|---------|
|                                                    | $\beta$ (95% CI) <sup>1, 3</sup> | P value | $\beta$ (95% CI) <sup>1, 3</sup> | P value | $\beta$ (95% CI) <sup>1, 3</sup> | P value | $\beta$ (95% CI) <sup>1, 3</sup> | P value |
| <b>Demographic</b>                                 |                                  |         |                                  |         |                                  |         |                                  |         |
| Age (years) <sup>2, 3</sup>                        | 0.01 (0.1, 0.03)                 | 0.001   | 0.00 (-0.06, 0.01)               | 0.49    | 0.02 (0.13, 0.05)                | 0.004   | 0.02 (0.12, 0.05)                | <0.001  |
| Sex                                                |                                  | <0.001  |                                  | <0.001  |                                  | 0.67    |                                  | <0.001  |
| Male (ref)                                         | ref                              |         | ref                              |         | ref                              |         | ref                              |         |
| Female                                             | 0.72 (0.66, 0.78)                |         | 0.34 (0.27, 0.41)                |         | 0.00 (-0.07, 0.07)               |         | 0.21 (0.15, 0.28)                |         |
| Marital Status                                     |                                  | 0.01    |                                  | 0.57    |                                  | 0.01    |                                  | 0.26    |
| No partner (ref)                                   | ref                              |         | ref                              |         | ref                              |         | ref                              |         |
| Partner                                            | 0.24 (0.16, 0.32)                |         | 0.02 (-0.07, 0.10)               |         | 0.08 (-0.01, 0.17)               |         | 0.08 (-0.01, 0.17)               |         |
| Ethnicity                                          |                                  | 0.28    |                                  | <0.001  |                                  | 0.20    |                                  | 0.01    |
| Caucasian (ref)                                    | ref                              |         | ref                              |         | ref                              |         | ref                              |         |
| Other                                              | -0.19 (-0.53, 0.14)              |         | 0.67 (0.31, 1.03)                |         | 0.25 (-0.11, 0.61)               |         | 0.51 (0.15, 0.87)                |         |
| Highest level of Education attained                |                                  | <0.001  |                                  | <0.001  |                                  | <0.001  |                                  | 0.005   |
| School (ref)                                       | ref                              |         | ref                              |         | ref                              |         | ref                              |         |
| Other educational institution (e.g. TAFE, college) | 0.17 (0.10, 0.24)                |         | 0.13 (0.06, 0.21)                |         | 0.08 (0.00, 0.16)                |         | 0.11 (0.04, 0.19)                |         |
| University                                         | 0.29 (0.21, 0.38)                |         | 0.33 (0.24, 0.42)                |         | 0.16 (0.07, 0.25)                |         | 0.18 (0.09, 0.27)                |         |
| Income (average before per annum)                  |                                  | 0.17    |                                  | 0.03    |                                  | 0.01    |                                  | 0.17    |
| <= \$40,000 (ref)                                  | ref                              |         | ref                              |         | ref                              |         | ref                              |         |
| \$40,001 to \$80,000                               | -0.07 (-0.17, 0.02)              |         | -0.03 (-0.12, 0.07)              |         | 0.04 (-0.06, 0.14)               |         | -0.04 (-0.13, 0.06)              |         |
| > \$80,001                                         | -0.08 (-0.18, 0.02)              |         | 0.08 (-0.02, 0.19)               |         | 0.16 (0.05, 0.26)                |         | 0.005 (-0.05, 0.16)              |         |
| Prefer not to say                                  | -0.11 (-0.21, -0.01)             |         | -0.06 (-0.16, 0.05)              |         | 0.00 (-0.11, 0.11)               |         | -0.05 (-0.15, 0.06)              |         |

<sup>1</sup>  $\beta$  estimates (95% CI) for z-scores of the Dietary Guideline Index 2013 (DGI-2013), EAT-Lancet Index, the Mediterranean Diet Index (MedDiet), and the Literature-Based Mediterranean Diet Index (Lit-MedDiet) based on linear regression modelling. <sup>2</sup> Likelihood ratio tests for non-linearity of age were >0.05 for all dietary indices, therefore age was modelled as a linear term. <sup>3</sup> For age, difference between the estimate of the mean and (mean - 0.5SD to mean + 0.5SD). For all other predictors, mean difference to the estimate for the reference level (reference level indicated by “ref”). <sup>4</sup> Analyses adjusted for age, sex, marital status, ethnicity, highest level of education attained, and income (model 1).

## References

1. Thorpe, M.G.; Milte, C.M.; Crawford, D.; McNaughton, S.A. A Revised Australian Dietary Guideline Index and Its Association with Key Sociodemographic Factors, Health Behaviors and Body Mass Index in Peri-Retirement Aged Adults. *Nutrients* **2016**, *8*, 160, doi:10.3390/nu8030160.
2. Stubbendorff, A.; Sonestedt, E.; Ramne, S.; Drake, I.; Hallström, E.; Ericson, U. Development of an EAT-Lancet Index and Its Relation to Mortality in a Swedish Population. *Am. J. Clin. Nutr.* **2022**, *115*, 705–716, doi:10.1093/ajcn/nqab369.
3. Willett, W.; Rockström, J.; Loken, B.; Springmann, M.; Lang, T.; Vermeulen, S.; Garnett, T.; Tilman, D.; DeClerck, F.; Wood, A.; et al. Food in the Anthropocene: The EAT–Lancet Commission on Healthy Diets from Sustainable Food Systems. *The Lancet* **2019**, *393*, 447–492, doi:http://dx.doi.org.ezproxy.library.uwa.edu.au/10.1016/S0140-6736(18)31788-4.
4. Hodge, A.M.; Bassett, J.K.; Dugué, P.-A.; Shivappa, N.; Hébert, J.R.; Milne, R.L.; English, D.R.; Giles, G.G. Dietary Inflammatory Index or Mediterranean Diet Score as Risk Factors for Total and Cardiovascular Mortality. *Nutr. Metab. Cardiovasc. Dis. NMCD* **2018**, *28*, 461–469, doi:10.1016/j.numecd.2018.01.010.
5. Sofi, F.; Macchi, C.; Abbate, R.; Gensini, G.F.; Casini, A. Mediterranean Diet and Health Status: An Updated Meta-Analysis and a Proposal for a Literature-Based Adherence Score. *Public Health Nutr.* **2014**, *17*, 2769–2782, doi:10.1017/S1368980013003169.
6. *Dietary Guidelines for Americans, 2020-2025*; U.S. Department of Agriculture and U.S. Department of Health and Human Services, 2020;
